# Supplementary material for: Cargo receptor Surf4 regulates endoplasmic reticulum export of proinsulin in pancreatic β-cells
Source: PubMed Central journal article supplement (PMC9106718; doi:10.1038/s42003-022-03417-6), 2022-05-13
Supplement: 42003_2022_3417_MOESM2_ESM.pdf [file 42003_2022_3417_MOESM2_ESM.pdf]

## Description of Additional Supplementary Files

**File name:** Supplementary Data

**Description:** Source data points behind the graphs.
